# Supplementary material for: Effects of load on good morning kinematics and EMG activity
Source: PeerJ. 2015 Jan 6;3:e708. doi: 10.7717/peerj.708 (PMC4304869; doi:10.7717/peerj.708)
Supplement: Supplemental Information 2 [file peerj-03-708-s002.xlsx]

## Sheet: Sheet1
ID	0.5	0.6	0.7	0.8	0.9
1	66.2	68.2	68.5	72.7	66.2
2	72	78.7	78.6		79.3
3	70.3	70.1	70.7	71.8	71.6
4	67	64.9	71.1	69.1	69.8
6	81.5	81.2	83	82.9	75.5
7	58.8	58.8	64.5	66.4	65.6
8	72	72.4	74	72.5	74.3
9	74.1	72.6	71.3	72.3	67.2
10	87.5	83.6	82.7
11	81.1	80.5	80.6	75.3	76.8
12	71.2	68.7	64.5	66.4	67.9
13	80.6	83.7	83.3	85.3	83.1
14	88.6	89.7	89	87.1	90.9
15	84.9	86.9	84.4	82.8	83.3
16	68.7	70.3	69	70.3	65.3
