# Supplementary material for: Effects of load on good morning kinematics and EMG activity
Source: PeerJ. 2015 Jan 6;3:e708. doi: 10.7717/peerj.708 (PMC4304869; doi:10.7717/peerj.708)
Supplement: Supplemental Information 3 [file peerj-03-708-s003.xlsx]

## Sheet: Sheet1
ID	0.5	0.6	0.7	0.8	0.9
1	16.3	15.8	13.9	11.5	14.8
2	44.2	41.8	43.9		31.5
3	33.9	34.4	31.7	34.8	28.1
4	34	33.6	27.1	29.9	28.5
6	24.7	20.8	23.3	26.3	34.8
7	46.3	42.6	31.4	34.4	33.2
8	19.9	17.9	18	19.1	19.4
9	33.7	32.3	30.8	24.6	25.5
10	-3.8	2.6	4.5
11	47.5	45.4	48.7	43.5	42.6
12	37.8	36.4	33.7	34.3	34.1
13	8.8	6.8	10	6.5	5.1
14	32	35.2	21.9	26.6	34.7
15	12.6	12.6	16.8	18.9	16.3
16	22.1	27	17.7	23.1	24.4
