# Supplementary material for: Effects of load on good morning kinematics and EMG activity
Source: PeerJ. 2015 Jan 6;3:e708. doi: 10.7717/peerj.708 (PMC4304869; doi:10.7717/peerj.708)
Supplement: Supplemental Information 4 [file peerj-03-708-s004.xlsx]

## Sheet: Sheet1
ID	0.5	0.6	0.7	0.8	0.9
1	129.2	130.1	125.7	128.4	130.6
2	121.1	115.1	116.8		110.1
3	130.5	133.7	133.8	134.4	136
4	120	119.7	114.8	118	115.8
6	108.7	108.7	109.1	105.2	107.9
7	115.3	115.8	117	114.3	114.2
8	124	126.1	125.4	124.6	128
9	125.7	127.1	126.4	127.2	123.7
10	120.4	116.9	118.3
11	130.5	126.4	127.2	128.4	127.9
12	114.9	112.5	114.1	110.6	112
13	117.2	116.5	113.7	112.6	109.8
14	112.7	113.3	114.5	111.7	112.8
15	117.6	115	117.9	117.1	115.6
16	129.7	128.4	128.7	130.5	130.1
