# Supplementary material for: Effects of load on good morning kinematics and EMG activity
Source: PeerJ. 2015 Jan 6;3:e708. doi: 10.7717/peerj.708 (PMC4304869; doi:10.7717/peerj.708)
Supplement: Supplemental Information 5 [file peerj-03-708-s005.xlsx]

## Sheet: MH
	50	60	70	80	90
1	9.31	11.3	13.4	13.1	21.8
2	26.4	23.8	36.3	32.8	38.1
3	24.8	33	33	35.9	32.3
4	24.5	25.9	24.1	30	28
6	20.1	23.5	32.3	33.2	47.6
7	25.8	28.2	29.8	28.3	34.8
8	18	23.8	26.5	65.6	33
9	9.65	7.41	17.9	19.7	36.1
10	24.1	46	49
11	30.3	30.6	32.8	33.7	39.4
12	28.2	15.2	28.5	32.3	26.5
13	52.7	46.7	61.1	62.5	70
14	38.4	44.6	58.6	54.4	51.6
15	27	32.5	28.5	34.8	44.7
16	33.2	33.3	44.7	38.8	48.4

## Sheet: LH
	50	60	70	80	90
1	21.3	21.8	28.3	23.2	45.3
3	33.1	34	39.4	44.6	47.7
4	32.8	20.6	20	29.8	26.3
6	11.3	10.4	20	20.3	26.7
7	15.5	18.7	19.2	17.8	24.2
8	5.96	8.55	8.71	36	13.3
9	16.2	13.4	26.5	25.4	32.5
10	12.2	23.6	21
11	20.9	19.5	23.2	23.9	31.4
12	12.5	10	17.3	17.2	20.7
13	16.4	13	13.8	16.5	26.2
14	36.2	38.7	47.7	44.7	47
15	9.76	11.2	12.4	15.1	18
16	29.2	27.1	41.2	33.4	41.2

## Sheet: TES
	50	60	70	80	90
1	34.9	50.3	48.3	53.7	55.4
2	28	39.9	48.9	50.8	38.7
3	14.4	23.5	30.2	30.1	26.6
4	10.8	27.8	27.5	28.3	31.6
6	10.3	19.9	42.9	61.8	13.6
7	47.1	41.5	48	47.9	55.4
8	35.7	36	37.1	99.1	38.4
9	119	114	140	149	163
10	45.9	41.8	50.6
11	53.9	68.8	67	66.9	68.6
12	30.3	21.8	41.1	48.9	46.2
13	50.9	49.4	57.4	58.8	59.1
14	50.9	57.5	55.8	70.1	91.7
15	88.8	89	110	126	119
16	75.2	101	116	95.4	138

## Sheet: LES
	50	60	70	80	90
1	48.9	51.6	63.8	65	82.3
2	49.5	51.5	65.7	77.2	50.1
3	16.4	30.4	22.7	32.9	15.9
4	22.9	40.5	39.4	43.9	46.2
6	63.6	70.7	75	84	86.7
7	48.5	43.7	46.8	46.7	53.9
8	56.6	63.2	66.8	186
9	41.3	41.5	51.9	72.2	80.8
10	32.1	31.6	33.1
11	75.4	94	99	102	107
12	26.8	20.9	41.9	44	45.3
13	43.3	37.5	42.8	46.9	45.4
14	69.2	79.3	87.1	76.9	110
15	83.5	78.7	86.6	83.8	91.9
16	84.4	87.8	100	92.1	105
