# Supplementary material for: Effects of load on good morning kinematics and EMG activity
Source: PeerJ. 2015 Jan 6;3:e708. doi: 10.7717/peerj.708 (PMC4304869; doi:10.7717/peerj.708)
Supplement: Supplemental Information 7 [file peerj-03-708-s007.xlsx]

## Sheet: Medial
	0.5	0.6	0.7	0.8	0.9
1	157	190	256	197	412
2	316	617	670	712	956
3	327	251	295	330	374
4	339	300	298	358	285
6	103	132	243	208	344
7	266	340	293	318	386
8	315	375	408	449	560
9	97	70	171	197	322
10	85	187	193
11	356	281	353	389	530
12	501	501	492	463	376
13	311	258	315	339	505
14	355	446	560	556	519
15	30	41	33	44	52
16	258	267	392	335	417

## Sheet: Lateral
	0.5	0.6	0.7	0.8	0.9
1	169	180	260	166	409
3	436	267	363	418	550
4	279	208	210	298	228
6	83	87	186	186	287
7	183	244	212	229	298
8	100	130	132	136	214
9	319	236	531	521	581
10	89	186	162
11	213	151	214	235	357
12	171	215	211	187	244
13	322	241	233	291	603
14	214	251	296	292	303
15	45	60	61	82	90
16	192	185	317	246	308

## Sheet: Thoracic
	0.5	0.6	0.7	0.8	0.9
1	168	240	260	221	297
2	307	672	591	736	655
3	154	145	218	220	248
4	444	455	463	468	437
6	45	96	249	336	89
7	291	266	276	321	361
8	500	458	460	500	521
9	502	416	581	647	618
10	194	206	240
11	194	188	219	229	278
12	405	459	487	515	542
13	191	175	188	203	272
14	166	201	189	247	320
15	170	200	223	283	245
16	61	83	104	83	121

## Sheet: Lumbar
	0.5	0.6	0.7	0.8	0.9
1	365	393	545	441	701
2	80	125	117	158	121
3	1323	1508	1153	2000	1037
4	654	707	715	766	681
6	180	220	287	205	387
7	389	358	338	392	451
8	539	513	545	641
9	416	368	501	748	756
10	257	292	297
11	358	334	407	490	551
12	422	517	580	541	607
13	54	44	47	54	69
14	245	293	315	291	416
15	148	164	161	175	177
16	161	172	215	193	227
